# Supplementary material
Source: PubMed Central journal article supplement (PMC3676112)
Supplement: JVI.00538-13_zjv999097697so1.pdf [file JVI.00538-13_zjv999097697so1.pdf]

**Supplemental Table 1. miRNA Targets up-represented in the up-translated genes.**

| miR family | miR expression rank | Number of up-translated target genes | Total number of target genes | p-value      |
|------------|---------------------|--------------------------------------|------------------------------|--------------|
| mir-133    | NA                  | 82                                   | 313                          | $< 10^{-07}$ |
| mir-17     | NA                  | 127                                  | 549                          | $< 10^{-07}$ |
| mir-154    | NA                  | 65                                   | 248                          | $< 10^{-05}$ |
| mir-29     | NA                  | 100                                  | 454                          | $< 10^{-05}$ |
| mir-34     | 864                 | 61                                   | 242                          | $< 10^{-05}$ |
| mir-449    | NA                  | 61                                   | 242                          | $< 10^{-05}$ |
| mir-875    | NA                  | 60                                   | 228                          | $< 10^{-05}$ |
| let-7      | NA                  | 94                                   | 436                          | $< 10^{-04}$ |
| mir-1207   | 459                 | 43                                   | 156                          | $< 10^{-04}$ |
| mir-125    | 511                 | 80                                   | 353                          | $< 10^{-04}$ |
| mir-30     | 968                 | 125                                  | 613                          | $< 10^{-04}$ |
| mir-9      | NA                  | 116                                  | 557                          | $< 10^{-04}$ |
| mir-646    | NA                  | 76                                   | 339                          | 0.0002       |
| mir-1263   | NA                  | 21                                   | 58                           | 0.0003       |
| mir-1274   | 1080                | 34                                   | 119                          | 0.0004       |
| mir-137    | NA                  | 96                                   | 463                          | 0.0004       |
| mir-142    | NA                  | 42                                   | 160                          | 0.0004       |
| mir-15     | 121                 | 112                                  | 560                          | 0.0004       |
| mir-322    | NA                  | 112                                  | 560                          | 0.0004       |
| mir-365    | 315                 | 31                                   | 105                          | 0.0004       |
| mir-497    | NA                  | 112                                  | 560                          | 0.0004       |
| mir-940    | 739                 | 41                                   | 156                          | 0.0004       |
| mir-484    | NA                  | 28                                   | 94                           | 0.0007       |
| mir-760    | NA                  | 45                                   | 182                          | 0.0009       |
| mir-1225   | NA                  | 15                                   | 38                           | 0.0010       |
| mir-124    | NA                  | 145                                  | 776                          | 0.0010       |
| mir-128    | NA                  | 89                                   | 435                          | 0.0010       |
| mir-1286   | NA                  | 24                                   | 77                           | 0.0010       |
| mir-506    | NA                  | 145                                  | 776                          | 0.0010       |
| mir-938    | NA                  | 22                                   | 69                           | 0.0012       |
| mir-101    | NA                  | 72                                   | 340                          | 0.0015       |
| mir-375    | NA                  | 23                                   | 75                           | 0.0015       |
| mir-379    | NA                  | 22                                   | 70                           | 0.0015       |
| mir-1825   | NA                  | 46                                   | 194                          | 0.0017       |

|          |     |    |     |        |
|----------|-----|----|-----|--------|
| mir-144  | NA  | 75 | 361 | 0.0018 |
| mir-290  | NA  | 69 | 327 | 0.0018 |
| mir-302  | NA  | 69 | 327 | 0.0018 |
| mir-373  | NA  | 69 | 327 | 0.0018 |
| mir-548  | NA  | 83 | 409 | 0.0018 |
| mir-580  | NA  | 32 | 121 | 0.0018 |
| mir-1260 | 258 | 27 | 97  | 0.0020 |
| mir-24   | 420 | 53 | 237 | 0.0022 |
| mir-214  | NA  | 52 | 233 | 0.0026 |
| mir-103  | 149 | 58 | 269 | 0.0028 |
| mir-1200 | NA  | 65 | 309 | 0.0028 |
| mir-129  | NA  | 39 | 162 | 0.0028 |
| mir-1827 | NA  | 47 | 206 | 0.0028 |
| mir-1233 | NA  | 18 | 56  | 0.0029 |
| mir-644  | NA  | 16 | 47  | 0.0030 |
| mir-138  | NA  | 48 | 213 | 0.0031 |
| mir-425  | 686 | 19 | 62  | 0.0038 |
| mir-499  | NA  | 34 | 138 | 0.0038 |
| mir-515  | NA  | 10 | 23  | 0.0038 |
| mir-1278 | NA  | 17 | 53  | 0.0040 |
| mir-188  | NA  | 32 | 128 | 0.0040 |
| mir-25   | NA  | 75 | 375 | 0.0041 |
| mir-32   | NA  | 75 | 375 | 0.0041 |
| mir-363  | NA  | 75 | 375 | 0.0041 |
| mir-367  | NA  | 75 | 375 | 0.0041 |
| mir-498  | NA  | 46 | 205 | 0.0041 |
| mir-199  | NA  | 52 | 241 | 0.0046 |
| mir-935  | NA  | 25 | 93  | 0.0046 |
| mir-153  | NA  | 59 | 282 | 0.0047 |

The search for miRNA target enrichment within regulated genes (transcriptionally or translationally up- or down-regulated) was performed with miRonTop software, which reveals potential miRNA signatures in the mRNA data.

No significant miRNA target enrichment was found for the transcriptionally up- and down-regulated and translationally down-regulated genes. In contrast, the translationally up-regulated genes presented significant enrichment in the mRNA targets of 112 miRNAs (Fisher's one-sided exact test with Benjamini Hochberg correction), suggesting involvement of these miRNAs in the translational up-regulation of these genes.
